# Supplementary material for: Non-stoichiometric CuxIn1−xS quantum dots for robust photodegradation of gemifloxacin: influencing parameters, intermediates, and insights into the mechanism
Source: Royal Society of Chemistry journal article supplement (doi:10.1039/d2va00143h), 2022-01-01
Supplement: d2va00143h1.pdf [file d2va00143h1.pdf]

## Electronic Supporting Information (ESI)

### Non-stoichiometric $\text{Cu}_x\text{In}_{1-x}\text{S}$ quantum dot for Robust Photodegradation of Gemifloxacin:

#### Influencing parameters, Intermediates, and Insights into the Mechanism

Deeptimayee Prusty, Sriram Mansingh, Kundan Kumar Das, Jyotirmayee Sahu and K.M. Parida\*

Centre for Nanoscience and Nanotechnology, Siksha 'O' Anusnadhan (Deemed to be University),  
Bhubaneswar-751030, Odisha (India)

#### Chemicals Requirement

Copper chloride dihydrate ( $\text{CuCl}_2 \cdot 2\text{H}_2\text{O}$ , 99%), Thioglycolic acid (TGA, 79%), sodium hydroxide (NaOH, 97%), NBT (Nitro Blue Tetrazolium chloride), TA (Terephthalic Acid) Methanol, Nafion,  $\text{Na}_2\text{SO}_4$ , NaCl,  $\text{NaNO}_3$ , DMSO, p- Benzoquinone, iso-propyl alcohol, citric acid and  $\text{Na}_2\text{CO}_3$  were purchased from Merck and Indium chloride ( $\text{InCl}_3$ , 98%), sodium sulfide nonahydrate ( $\text{Na}_2\text{S} \cdot 9\text{H}_2\text{O}$ , 58%), DMPO from Himedia chemical company. All reagents are in analytical grade and are used in reaction without further purification.

#### Characterization techniques

| Sl. No. | Instrument                                         | Description                                                                                                 | Model name                    | Company name |
|---------|----------------------------------------------------|-------------------------------------------------------------------------------------------------------------|-------------------------------|--------------|
| 1       | Field Emission Scanning Electron Microscopy(FESEM) | Sample was dispersed in ethanol, coated with Au, Al foil used for deposition                                | FEI Quanta 400FEG_SEM         | FEI          |
| 2       | X-ray diffraction (XRD)                            | Cu $K\alpha$ radiation ( $\lambda = 1.54 \text{ \AA}$ ) at a $2\theta$ range of $10-60^\circ$ , 40 KV/40 mA | Rigaku-Ultima-IV              | Rigaku       |
| 3       | X- ray photoelectron spectroscopy (XPS)            | Non-monochromatic $K\alpha$ Mg X-ray, 284.8 eV binding energy of C 1s as reference                          | VG MicrotechMultilabESCA 3000 | VG           |

|   |                                                             |                                                                                                                                                                                                                        |                                          |                  |
|---|-------------------------------------------------------------|------------------------------------------------------------------------------------------------------------------------------------------------------------------------------------------------------------------------|------------------------------------------|------------------|
| 4 | Photoluminescencespectro fluorometer (PL)                   | Xe- lamp as excitation source, dueterium UV lamp                                                                                                                                                                       | JASCO-FP-8300                            | JASCO            |
| 5 | UV- visible diffuse reflectance spectroscopy (UV – VIS DRS) | Deuterium UV lamp and Xe visible light, BaSO <sub>4</sub> as reference                                                                                                                                                 | JASCO-V-750                              | JASCO            |
| 6 | Electrochemical analyser                                    | Three electrode system such as synthesized sample as a working electrode, platinum as counter electrode and Ag/AgCl as reference electrode, 0.1 M Na <sub>2</sub> SO <sub>4</sub> solution at pH of 6.8 as electrolyte | multi-channel-IVIUMpotentios tatanalyzer | IVIUM Technology |
| 7 | High resolution transmission electron microscope (HRTEM)    | 200kV acceleration voltage                                                                                                                                                                                             | TEM, JEOL-2100                           | JEOL             |

#### **Gemifloxacin photodegradation experiment:**

In the performed photodegradation reaction, 20 mg of catalyst was dispersed in 20 mL of 10 ppm gemifloxacin model pollutant solution (by dissolving required amount of Gemifloxacin in deionized water). Prior to photo-irradiation the above suspension was kept in dark under slow stirring for 30 min to develop adsorption-desorption equilibrium between catalyst and GMF. After that, the suspension in neutral medium was illuminated with a 20 W LED bulb for 120 min under constant stirring at room temperature. Then, the light treated solution was filtered and the absorbance of supernatant (degraded GMF) was measured using UV-Vis spectrophotometer within wavelength window of 200 to 400 nm. To figure out the intermediates/by-products of GMF degradation Liquid Chromatography (LC) (Agilent 6890)-Mass Chromatography (MS) (Agilent 5973) analysis of the supernatant is also carried out. Further, external parameters like (i) presence of anion, and (ii) pH variation is also studied. Scavenger experiment, blank reaction and degradation without catalyst are performed to trace the active species responsible for degradation

and to justify that the degradation over catalyst goes via photocatalytic pathway following our reported articles.

#### **Preparation of working electrodes:**

Dropcast method was employed to prepare the working electrodes by taking 2 mg of as prepared materials. Then the catalyst was dispersed in solution of 40  $\mu$ L nafion and 1.4ml ethanol to form suspension which was sonicated for 7 min forming uniform solution and then was drop casted on 1 cm<sup>2</sup> area of a FTO (Fluorine Doped Tin Oxide). In order to study electrochemical analysis, the catalyst loaded area was dried at room temperature in a vacuum oven whole night.

Table. S1: Calculated compositional ratios of all the synthesized catalysts from XPS.

| <b>Catalyst</b>                            | <b>Cu</b> | <b>In</b> |
|--------------------------------------------|-----------|-----------|
| Cu <sub>0.25</sub> In <sub>0.75</sub> S QD | 0.24      | 0.76      |
| Cu <sub>0.5</sub> In <sub>0.5</sub> S QD   | 0.51      | 0.49      |
| Cu <sub>0.75</sub> In <sub>0.25</sub> S QD | 0.74      | 0.26      |

Table. S2: VB, CB and E<sub>g</sub> of all the synthesized catalysts.

| <b>Catalyst</b>                            | <b>VB vs. NHE (V)</b> | <b>CB vs. NHE (V)</b> | <b>E<sub>g</sub> (eV)</b> |
|--------------------------------------------|-----------------------|-----------------------|---------------------------|
| Cu <sub>0.25</sub> In <sub>0.75</sub> S QD | 1.18                  | -0.65                 | 1.84                      |
| Cu <sub>0.5</sub> In <sub>0.5</sub> S QD   | 1.27                  | -0.75                 | 2.03                      |
| Cu <sub>0.75</sub> In <sub>0.25</sub> S QD | 1.22                  | -1.01                 | 2.24                      |

Table. S3: Comparison Table for degradation of GMF using various photocatalysts.

| S.L.<br>No. | Photocatalyst                                       | Reaction condition                                                              | Degradation<br>Efficiency | Reference |
|-------------|-----------------------------------------------------|---------------------------------------------------------------------------------|---------------------------|-----------|
| 1           | Zn-Co-LDH<br>@biochara                              | 10W UV-B light, 100 min, 30 ppm                                                 | 92.70%                    | 1         |
| 2           | Activated<br>carbon@Au/ZnO                          | 250W visible lamp, 35 min, 20<br>ppm                                            | 98.00%                    | 2         |
| 3           | Pt/Bi <sub>2</sub> S <sub>3</sub> nanoflakes        | 250W and 30W/cm <sup>2</sup> power<br>density visible light, 25 min, 20<br>ppm  | 93.00%                    | 3         |
| 4           | TiO <sub>2</sub> / H <sub>2</sub> O <sub>2</sub>    | 6W UV lamp, 30 min, 100ppm                                                      | 91.00%                    | 4         |
| 5           | ZnFe <sub>2</sub> O <sub>4</sub> /WO <sub>3-x</sub> | 150W Xenon lamp, 60 min,<br>100 ppm                                             | 95.00%                    | 5         |
| 6           | BiVO <sub>4</sub> @Ag@CoAl<br>LDH                   | 300W Xenon lamp, 90min,<br>20 ppm                                               | 89.72%                    | 6         |
| 7           | Carbon doped TiO <sub>2</sub><br>nanoparticle       | LED irradiation, 60 min, Na <sub>2</sub> S<br>applied to cease reaction, 50 ppm | 74.00%                    | 7         |
| 8           | Cu <sub>0.75</sub> In <sub>0.25</sub> S QD          | 20 W LED Lamp, 2 h, 10 ppm                                                      | 95.00%                    | This Work |

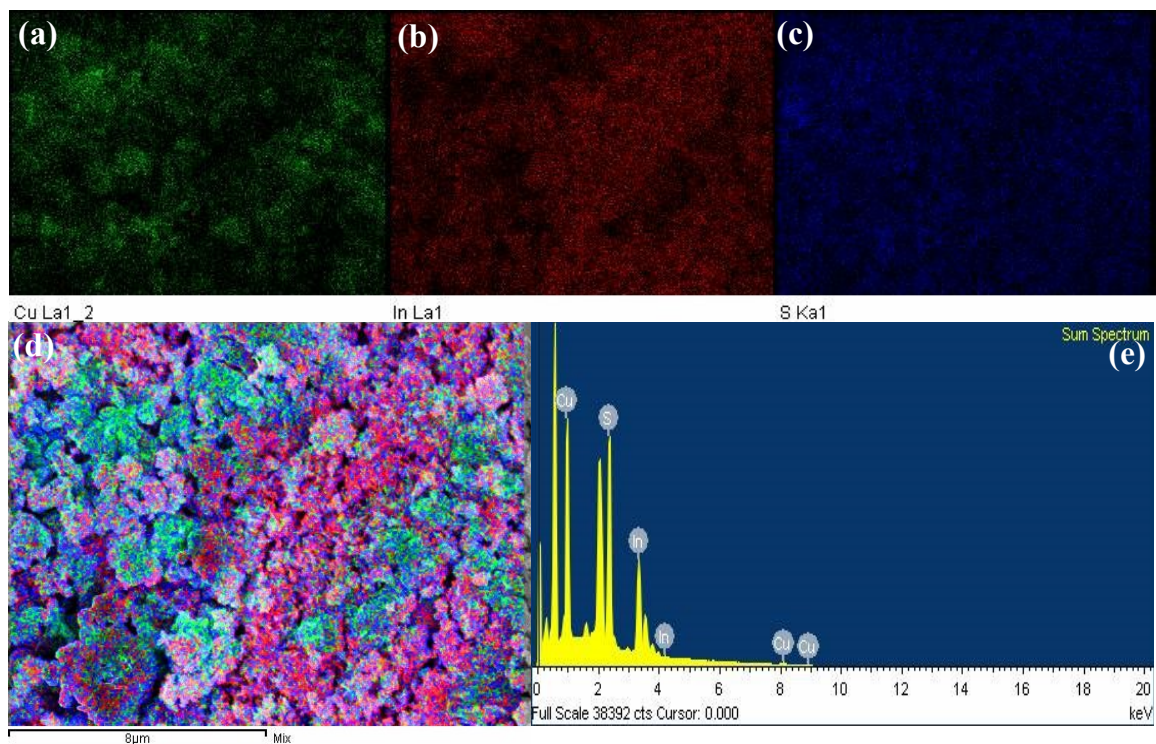

Fig. S1: Color mapping image of (a) Cu, (b) In, (c) S, and (d)  $\text{Cu}_{0.75}\text{In}_{0.25}\text{S}$ ; (e) EDX image of  $\text{Cu}_{0.75}\text{In}_{0.25}\text{S}$  QD.

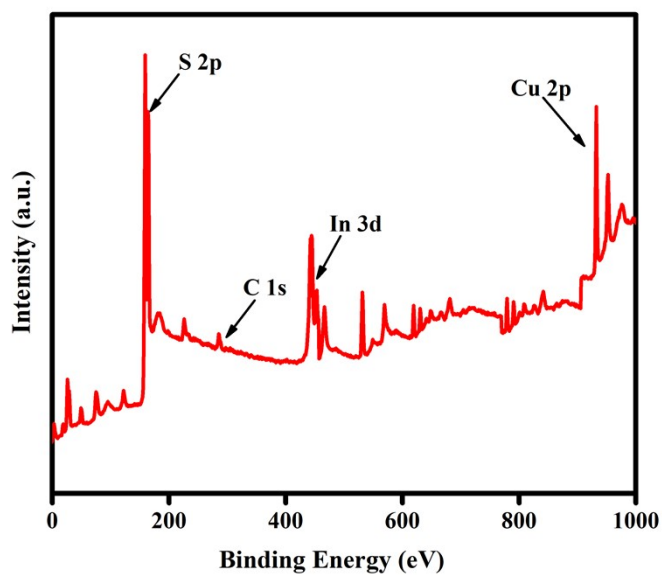

Fig. S2: XPS Survey of  $\text{Cu}_{0.75}\text{In}_{0.25}\text{S}$  QD.

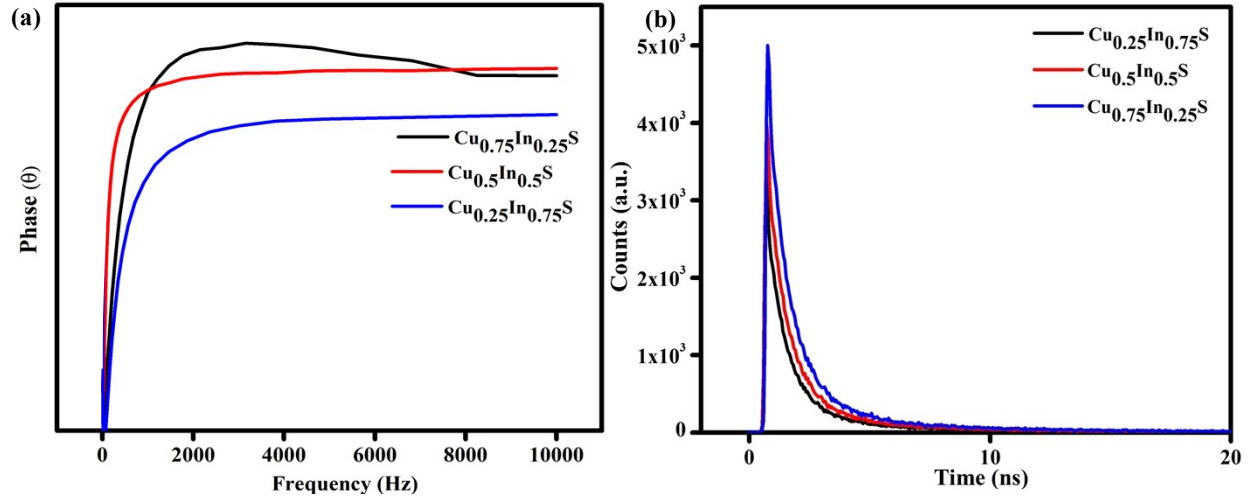

Fig. S3: (a) Bode-phase plot and (b) TR-PL plot of Cu<sub>0.25</sub>In<sub>0.75</sub>S, Cu<sub>0.5</sub>In<sub>0.5</sub>S and Cu<sub>0.75</sub>In<sub>0.25</sub>S QDs.

Tri-exponential function for TRPL fitting:<sup>8</sup>

$$\text{Fit} = A + \alpha_1 \exp \{-t / \tau_1\} + \alpha_2 \exp \{-t / \tau_2\} + \alpha_3 \exp \{-t / \tau_3\} \text{ ----- S1}$$

Where A is a constant,  $\alpha_1$ ,  $\alpha_2$  and  $\alpha_3$  are relative contributions;  $\tau_1$ ,  $\tau_2$  and  $\tau_3$  are decay times of the compounds. The average life-times ( $\tau_{\text{avg}}$ ) of Cu<sub>0.25</sub>In<sub>0.75</sub>S, Cu<sub>0.5</sub>In<sub>0.5</sub>S and Cu<sub>0.75</sub>In<sub>0.25</sub>S QDs were estimated by following the equation below:

$$\tau_{\text{avg}} = \frac{\alpha_1 \tau_1^2 + \alpha_2 \tau_2^2 + \alpha_3 \tau_3^2}{\alpha_1 \tau_1 + \alpha_2 \tau_2 + \alpha_3 \tau_3} \text{ ----- S2}$$

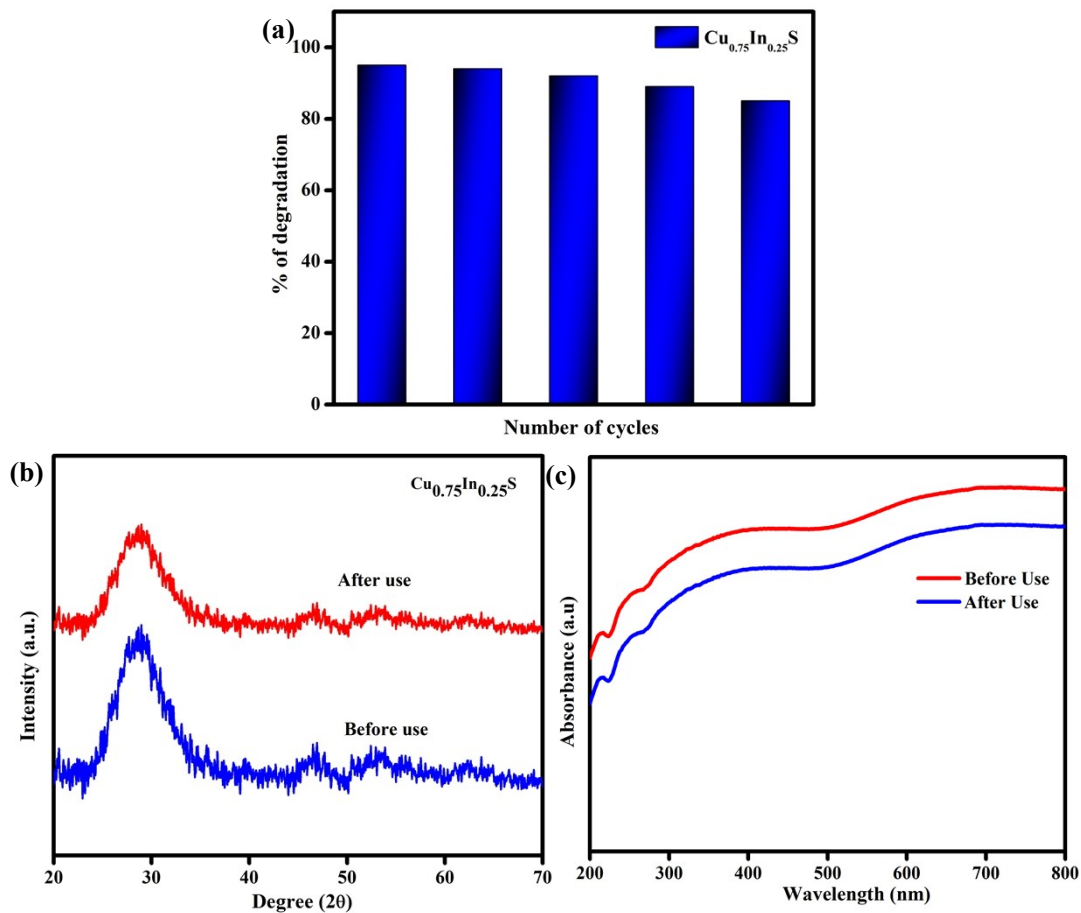

Fig. S4: (a) Degradation plot of  $\text{Cu}_{0.75}\text{In}_{0.25}\text{S}$  QD for five successive times; (b) XRD plot, and (b) UV-Vis absorbance plot of  $\text{Cu}_{0.75}\text{In}_{0.25}\text{S}$  QD after and before use.

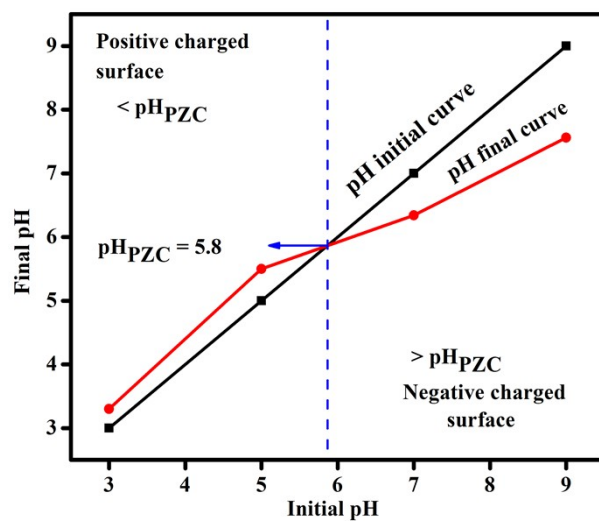

Fig. S5: PZC plot of  $\text{Cu}_{0.75}\text{In}_{0.25}\text{S}$  QD.

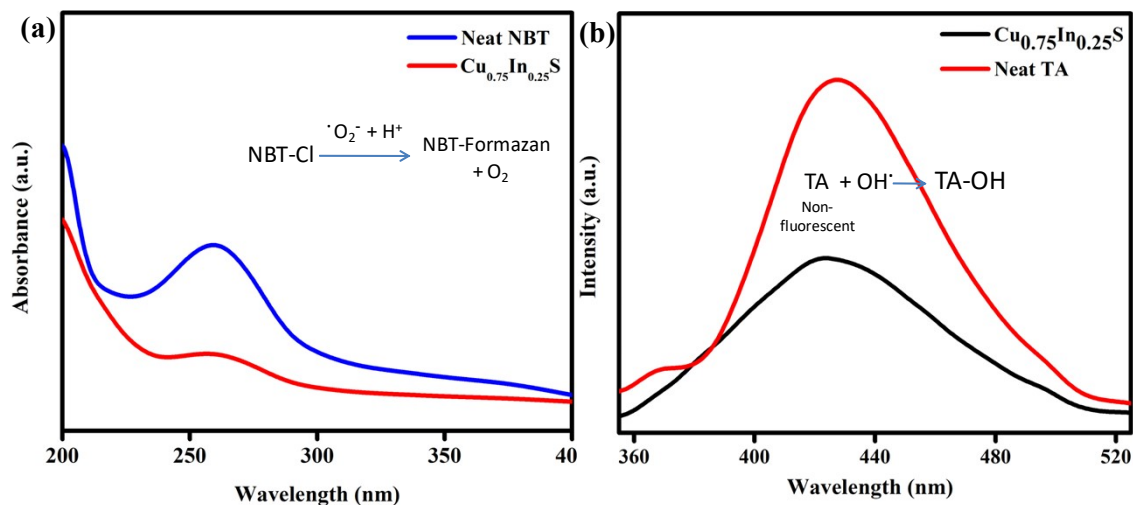

Fig. S6: (a) UV-Vis DRS spectra of neat NBT and  $\text{Cu}_{0.75}\text{In}_{0.25}\text{S}$  QD; and (b) PL-emission spectra of neat TA and  $\text{Cu}_{0.75}\text{In}_{0.25}\text{S}$  QD.

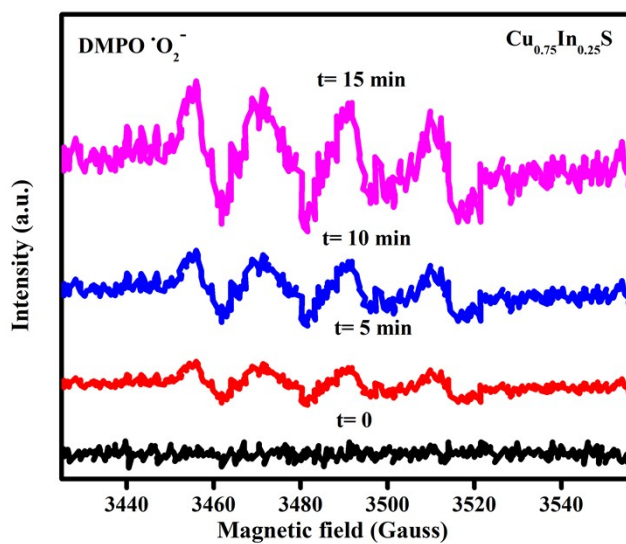

Fig. S7: ESR analysis of  $\text{Cu}_{0.75}\text{In}_{0.25}\text{S}$  QD in different time interval.

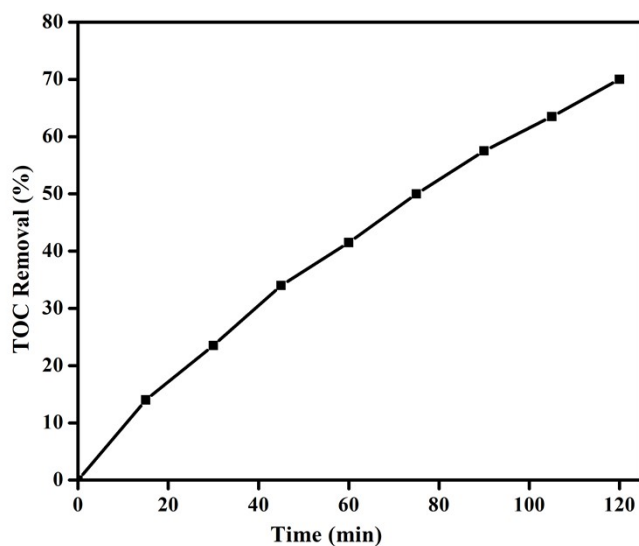

Fig. S8: Mineralization percentage of  $\text{Cu}_{0.75}\text{In}_{0.25}\text{S}$  QD.

#### REFERENCE:

1. P. Gholami, A. Khataee, R.D.C. Soltani, L. Dinpazhoh and A. Bhatnagar, *J. Hazard. Mater.*, 2020, **382**,121070.
2. M. Faisal, M. Alsaieri, M.A. Rashed and F.A. Harraz, *J. Mater. Res. Technol.*, 2021, **14**, 954-967.
3. M. Faisal, M. A. Rashed, M. A. M. Alhmami and F. A. Harraz, *J. Photochem. Photobiol. A: Chem.*, 2021, **414**, 113288.
4. F.A. Ibrahim, M.A. Al-Ghobashy, A. El-Rahman, K. Mohamed and I. F. Abo-Elmagd, *Environ. Sci. Pollut. Res*, 2017, **24**, 23880-23892.
5. K. K. Das, D.P. Sahoo, S. Mansingh and K. Parida, *ACS omega*, 2021, **6**, 30401-30418.
6. B. Baral, D. P. Sahoo, and K. Parida, *Inorg. Chem.*, 2021, **60**, 1698-1715.
7. F.A. Ibrahim, M.A. Al-Ghobashy and I. F. Abo-Elmagd, *SN Appl. Sci.*, 2019, **1**, 1-14.
8. B.P. Mishra, L. Acharya, S. Subudhi and K. Parida, *Int. J. of Hydrog. Energy*, **2022**.
